# Supplementary material
Source: publisher figshare collection journal article supplement (https://gsajournals.figshare.com/ndownloader/files/12998267)
Supplement: Supplementary file 1 [file 12998267]

## Sheet: Sheet1
Supplemental Table 1.	Complete correlation data of cardiac transcripts with ISO-induced left ventricular dilation
ilmn_id	symbol	cor	p-value
ILMN_2698449	Dtr	0.432653	2.55592e-05
ILMN_2768087	Col6a1	0.428586	3.10127e-05
ILMN_2636424	Itgbl1	0.413735	6.15538e-05
ILMN_2818294	Srpx2	0.409998	7.27787e-05
ILMN_2883952	1810015A11Rik	0.409851	7.32575e-05
ILMN_2887408	Galr3	0.406137	8.63534e-05
ILMN_2597831	Cacna1c	-0.403025	9.89643e-05
ILMN_2748402	Col5a1	0.397822	0.000123924
ILMN_2603958	9130427A09Rik	0.391185	0.000164224
ILMN_2721149	Arl11	0.388621	0.00018281
ILMN_2946873	D030070L09Rik	0.387737	0.000189655
ILMN_2638256	Tex16	-0.379201	0.000269028
ILMN_1259388	Col6a1	0.378289	0.000279116
ILMN_2711163	Ctsk	0.378222	0.000279871
ILMN_2811421	Matk	0.377012	0.00029382
ILMN_2782964	Enpp1	0.375733	0.000309264
ILMN_2664660	Aldh5a1	-0.374778	0.000321268
ILMN_2690603	Spp1	0.373512	0.000337852
ILMN_3136561	Sparc	0.373378	0.000339655
ILMN_1232884	Sphk1	0.370964	0.000373632
ILMN_2750201	1700023I07Rik	0.370465	0.000381035
ILMN_2975345	Cdo1	-0.370208	0.000384906
ILMN_2641956	Nab2	-0.369673	0.000393063
ILMN_2833163	BC064033	0.369268	0.000399353
ILMN_2613601	2010001M09Rik	-0.367254	0.000431986
ILMN_1231851	Enpp1	0.365424	0.000463744
ILMN_2953515	Aldh3b1	0.365018	0.000471087
ILMN_1223552	Fbn1	0.364733	0.000476297
ILMN_2645526	Abcc8	-0.362926	0.000510563
ILMN_2614655	Gpnmb	0.362547	0.000518034
ILMN_1214571	Cd109	0.361001	0.000549547
ILMN_1225835	Mfap5	0.360316	0.000564066
ILMN_2702704	Ndufv1	-0.359106	0.000590559
ILMN_2725484	Padi4	0.358726	0.000599127
ILMN_2691951	Polydom	0.358018	0.000615374
ILMN_1221611	Pitpn	0.357195	0.000634752
ILMN_1228485	Csnk2a2	-0.356225	0.000658329
ILMN_2838317	Pqlc3	0.356162	0.000659863
ILMN_1221800	Gabpa	-0.356153	0.000660089
ILMN_2646254	1700102P08Rik	-0.356125	0.000660781
ILMN_3022719	Wiz	-0.355489	0.000676719
ILMN_2453695	Urod	-0.352588	0.000753948
ILMN_2837100	Gm128	0.352201	0.000764841
ILMN_3116885	Gpr137b	0.352141	0.000766555
ILMN_2487358	Eif3s6	0.350658	0.0008097
ILMN_2671755	Ceecam1	0.350568	0.000812388
ILMN_2492500	Zfhx1a	0.350522	0.000813787
ILMN_1249124	9030625G08Rik	-0.349843	0.000834372
ILMN_2730701	Pqlc3	0.348961	0.000861813
ILMN_2871767	Aqp12	0.34889	0.000864044
ILMN_2768786	Ablim2	-0.348445	0.000878253
ILMN_2736005	Dbn1	0.347957	0.000894066
ILMN_1217009	Rab15	0.347932	0.000894861
ILMN_2687872	Col1a1	0.346903	0.000929087
ILMN_1258360	Efcbp1	-0.34668	0.000936652
ILMN_3071356	Dbi	0.346345	0.000948116
ILMN_2619316	Prnp	0.345074	0.000992846
ILMN_2698728	Srpx2	0.345016	0.000994914
ILMN_2964042	Bgn	0.344692	0.00100664
ILMN_2734683	Fstl1	0.342634	0.00108406
ILMN_1251370	Ndufa1	-0.342243	0.00109938
ILMN_2740852	F2r	0.342083	0.00110573
ILMN_2821263	Eps8l2	-0.341795	0.00111719
ILMN_1250421	Mmp12	0.34147	0.00113026
ILMN_2680011	Fgd4	-0.341187	0.00114172
ILMN_2968887	D630044L22Rik	-0.340548	0.00116804
ILMN_2746830	BC022224	-0.340407	0.00117394
ILMN_2938904	Gsto2	-0.340263	0.00117997
ILMN_1214602	Sfrp2	0.340036	0.00118956
ILMN_2915689	D11Lgp2e	0.339213	0.00122486
ILMN_2768026	Gusb	0.338892	0.00123889
ILMN_2723726	9430007A20Rik	0.338597	0.0012519
ILMN_1235811	1110032E23Rik	0.338296	0.00126531
ILMN_2726857	Kcnd1	0.338259	0.00126697
ILMN_1229500	Gzmm	-0.337596	0.00129702
ILMN_2705166	St6gal1	0.336856	0.00133131
ILMN_2953513	Aldh3b1	0.33606	0.0013691
ILMN_2611699	Jmjd1b	-0.335945	0.00137464
ILMN_2976448	E330036I19Rik	0.335367	0.00140278
ILMN_1232372	Sik2	-0.335342	0.00140401
ILMN_2705499	B230378H13Rik	0.335288	0.00140667
ILMN_2589615	Ptrh1	0.335099	0.00141604
ILMN_2640625	Olfr1099	0.334019	0.00147051
ILMN_2904765	Snai1	0.333908	0.00147619
ILMN_1247614	Dusp18	-0.333497	0.00149748
ILMN_1232456	Nnat	0.333343	0.00150554
ILMN_1216662	Kif5c	0.333068	0.00151999
ILMN_1256430	Mcoln3	0.331645	0.00159692
ILMN_1226259	Adamts2	0.331206	0.00162141
ILMN_2729289	Matn4	0.331063	0.00162942
ILMN_2665490	Litaf	0.330976	0.00163432
ILMN_2687602	Pou2f2	0.330829	0.00164263
ILMN_2679276	Il19	-0.33009	0.001685
ILMN_1223029	Rab8b	0.330014	0.00168945
ILMN_2971816	Gltp	0.329379	0.00172671
ILMN_2625351	Sh3bgrl3	0.329203	0.00173723
ILMN_3078175	Nfix	-0.329101	0.00174328
ILMN_3055425	Pofut1	-0.32881	0.00176082
ILMN_2842338	Tbc1d10c	-0.328773	0.00176301
ILMN_2707400	Ilf3	-0.328668	0.00176941
ILMN_1253538	Ttll1	-0.328553	0.00177637
ILMN_2496664	Zfp346	-0.328505	0.00177931
ILMN_2703099	Ipo4	0.32781	0.00182211
ILMN_2678607	Ms4a4c	0.32725	0.00185731
ILMN_2677191	Aipl1	0.326973	0.00187492
ILMN_1224005	Adam8	0.326843	0.00188321
ILMN_2604307	Havcr1	0.326742	0.00188971
ILMN_2635145	Olfr461	-0.32671	0.0018918
ILMN_3149776	B3gnt8	0.325824	0.00194962
ILMN_1238309	A2bp1	-0.325699	0.00195792
ILMN_1245354	Tlr7	0.325094	0.00199849
ILMN_1234824	2610001E17Rik	0.325067	0.00200037
ILMN_2478101	Tor3a	0.324566	0.00203458
ILMN_2987709	Slc15a3	0.324103	0.00206659
ILMN_2491565	Tuba3	-0.323844	0.00208477
ILMN_1230055	E330023O18	-0.323575	0.00210376
ILMN_2671001	Pkhd1	-0.323389	0.00211695
ILMN_2815258	V1rc24	0.32321	0.00212977
ILMN_2896843	Cd248	0.322743	0.0021635
ILMN_2596596	Rgs1	0.3227	0.00216661
ILMN_2718204	Scgf	0.322087	0.00221165
ILMN_2713419	Slc37a3	-0.321947	0.00222205
ILMN_1258457	Ndst3	0.321181	0.00227974
ILMN_2648569	Dlc1	-0.320176	0.00235752
ILMN_2702101	Pld3	0.319886	0.00238039
ILMN_2901331	Olfr771	0.319472	0.00241341
ILMN_1227836	Arpc1b	0.318945	0.002456
ILMN_2694110	MGC58818	0.318612	0.00248328
ILMN_2711181	2810002I04Rik	0.318554	0.00248808
ILMN_2645793	Aldh3b1	0.318491	0.00249322
ILMN_2775402	9330132O05Rik	0.318356	0.00250446
ILMN_2645901	1110007F12Rik	-0.31832	0.00250739
ILMN_2638114	Ptn	0.318254	0.00251292
ILMN_1235310	3110062M04Rik	-0.317824	0.00254891
ILMN_1250201	B930041F14Rik	0.31688	0.00262956
ILMN_2932164	5730593N15Rik	-0.316827	0.00263417
ILMN_2705203	Pdzx	-0.316534	0.00265973
ILMN_2900502	Gm94	0.31642	0.00266965
ILMN_2992709	Trem2	0.316322	0.00267834
ILMN_2972627	Hint3	-0.316172	0.00269152
ILMN_3082031	Whrn	-0.31541	0.0027597
ILMN_2883392	S100a11	0.315243	0.0027749
ILMN_1219188	Akr1b8	0.315206	0.00277825
ILMN_2861686	Olfr618	0.314852	0.00281062
ILMN_1216871	Lcp1	0.314806	0.00281487
ILMN_2759079	Ppap2a	0.314627	0.00283143
ILMN_2743013	Ncf4	0.314568	0.00283691
ILMN_2997022	Idh3g	-0.314557	0.00283789
ILMN_2664533	Tbx5	-0.314129	0.00287785
ILMN_2698911	5330410G16Rik	0.313955	0.00289421
ILMN_2708519	4930438M06Rik	0.313597	0.00292827
ILMN_3078327	Bcl2l11	-0.313594	0.0029285
ILMN_2817717	Tspan17	0.313475	0.00293986
ILMN_2792809	Arpc5	0.313318	0.00295496
ILMN_1213483	B430214A04Rik	-0.312924	0.00299307
ILMN_2721929	Havcr2	0.312743	0.00301079
ILMN_2793827	2018-03-04	0.312681	0.00301678
ILMN_2737193	Eif3s4	-0.312382	0.00304624
ILMN_2639498	1500041J02Rik	0.312372	0.00304721
ILMN_3120652	1810031K02Rik	0.311868	0.00309743
ILMN_2696110	2900041A09Rik	-0.311611	0.0031233
ILMN_2822579	Col4a2	0.311594	0.00312506
ILMN_2725523	Htr2a	0.311167	0.0031685
ILMN_2648669	Gpnmb	0.310891	0.00319686
ILMN_2690839	Esam1	0.310822	0.00320406
ILMN_2609998	Fxyd6	0.310649	0.00322198
ILMN_2886618	Nbl1	0.310632	0.00322371
ILMN_2767905	Clk1	-0.310279	0.00326066
ILMN_2669062	Pi16	0.309676	0.00332453
ILMN_1248099	Col16a1	0.309659	0.00332633
ILMN_1253347	4921507P07Rik	-0.309637	0.00332874
ILMN_2708546	2610034H20Rik	0.30944	0.00334984
ILMN_1250193	Olfr993	0.309308	0.00336408
ILMN_2709839	Maz	-0.308302	0.00347441
ILMN_2921303	Tyms-ps	0.307355	0.00358111
ILMN_2771034	Mfge8	0.307268	0.00359114
ILMN_2756613	Adam8	0.3071	0.00361036
ILMN_2625451	Ankrd1	0.307059	0.00361514
ILMN_2739517	Nrbf1	-0.307051	0.00361606
ILMN_2997494	Lox	0.306879	0.00363585
ILMN_2422333	Trap1	-0.30672	0.00365434
ILMN_2431871	Fbxo30	-0.306686	0.00365834
ILMN_1226822	4933403L16Rik	-0.306631	0.00366478
ILMN_1229255	Bcl2l11	-0.306263	0.00370786
ILMN_2663258	Clecsf12	0.306063	0.00373147
ILMN_1240719	BC004044	0.306047	0.00373343
ILMN_1227907	Gmfg	0.306047	0.00373344
ILMN_1245131	7030401O21Rik	-0.305995	0.00373952
ILMN_2711705	Dusp11	-0.305936	0.00374658
ILMN_2601196	Asph	0.305766	0.00376692
ILMN_1258629	Col3a1	0.305468	0.00380259
ILMN_2950286	Ankrd1	0.305352	0.00381669
ILMN_2600104	Hif1an	-0.305253	0.00382868
ILMN_2897891	Rgs1	0.305055	0.00385269
ILMN_2898319	Aldh1l2	-0.304714	0.00389456
ILMN_2676515	Cntn4	0.304679	0.00389881
ILMN_2589651	Anpep	0.304609	0.00390752
ILMN_3161936	Mpp1	0.304267	0.00394985
ILMN_2914453	Plekha5	-0.304171	0.00396193
ILMN_2694955	Igfbp4	0.304069	0.00397472
ILMN_1233693	Slc30a7	0.303812	0.00400703
ILMN_1248413	Tnfsf6	0.303659	0.00402636
ILMN_2833985	BC003324	0.303549	0.00404036
ILMN_2588572	Rab14	-0.303533	0.00404244
ILMN_2623884	BC019755	0.303495	0.00404718
ILMN_1218116	Bmp1	0.303419	0.00405688
ILMN_1233455	Olfml3	0.303302	0.00407191
ILMN_1258988	Igfbp4	0.303203	0.00408459
ILMN_2722108	C1qtnf1	0.30301	0.00410946
ILMN_2484420	Slc4a11	0.302756	0.00414239
ILMN_2605031	E330018D03Rik	-0.302528	0.00417216
ILMN_3001540	Lum	0.302326	0.00419872
ILMN_2679037	Cklfsf3	0.302241	0.0042099
ILMN_3155245	Arhgap25	0.302155	0.00422123
ILMN_2754698	Cd84	0.302041	0.00423632
ILMN_2694275	Lxn	0.30201	0.00424052
ILMN_1239653	Mclc	-0.301735	0.00427712
ILMN_1243290	Eya3	-0.301615	0.00429322
ILMN_2927638	Mxra8	0.301474	0.00431226
ILMN_2642615	Commd2	0.301444	0.00431624
ILMN_2689790	Igfbp6	0.301088	0.00436455
ILMN_1253741	Pcolce	0.301049	0.00436986
ILMN_2844353	AI747448	0.300777	0.0044072
ILMN_2479585	Zfp189	-0.300773	0.00440771
ILMN_2689230	6430590A10Rik	0.300099	0.00450127
ILMN_2935909	Bcl2l12	-0.299959	0.00452088
ILMN_1249766	Gbx2	0.299901	0.00452911
ILMN_1249334	Arpc4	0.29933	0.00461024
ILMN_1249336	Mmp13	0.299253	0.00462124
ILMN_2782061	Slc4a3	-0.299184	0.00463104
ILMN_2674351	Ednra	-0.298721	0.00469811
ILMN_2927373	Ddit3	-0.298663	0.00470654
ILMN_1242025	Kcnc4	-0.298353	0.00475187
ILMN_2501489	Was	0.298225	0.00477071
ILMN_2713353	Cabp4	0.297976	0.00480759
ILMN_3163221	5730494M16Rik	0.297913	0.004817
ILMN_2774701	D11Moh35	0.297539	0.00487288
ILMN_2650115	A930008K15Rik	0.297419	0.00489098
ILMN_2613803	1700034O15Rik	-0.296891	0.00497121
ILMN_2475727	Ube2l3	-0.296803	0.00498474
ILMN_2692399	Thsd6	0.296694	0.00500144
ILMN_2454204	Tnfrsf22	0.296506	0.00503053
ILMN_2729783	Ahrr	-0.296501	0.00503119
ILMN_2738825	Acta1	0.296465	0.00503678
ILMN_3104414	Etfb	-0.29637	0.00505156
ILMN_1247019	Zfp786	0.29636	0.00505308
ILMN_1255871	Loxl1	0.296327	0.00505821
ILMN_2732721	Flt1	-0.296078	0.00509711
ILMN_2597432	Crip3	-0.295971	0.00511384
ILMN_2946088	Panx1	0.295921	0.00512163
ILMN_3084954	Tes	0.295918	0.00512213
ILMN_1247343	Lmcd1	0.295818	0.00513794
ILMN_2539961	LOC384569	0.295693	0.00515769
ILMN_2684222	1210002B07Rik	0.295194	0.00523708
ILMN_2714073	2610027C15Rik	0.295182	0.00523892
ILMN_2621643	Col4a1	0.295032	0.00526309
ILMN_2684261	Mtbp	0.294988	0.00527011
ILMN_2468778	Uxs1	-0.294984	0.00527074
ILMN_2636855	Enah	0.294877	0.00528807
ILMN_1237630	Oaz3	0.293946	0.00544061
ILMN_2971999	Iqgap3	0.293794	0.00546586
ILMN_2534090	LOC216443	-0.293581	0.0055014
ILMN_2856383	Gpr112	0.293555	0.00550567
ILMN_2702403	Htr3a	-0.293515	0.00551238
ILMN_2698499	Nox4	0.29348	0.00551824
ILMN_2655005	Prkwnk1	-0.293166	0.00557121
ILMN_1252584	C1qtnf4	-0.293121	0.00557887
ILMN_2943477	Lcmt1	-0.292845	0.00562583
ILMN_2966519	4932701A20Rik	0.292741	0.00564356
ILMN_2656755	Mgat5	0.292557	0.00567514
ILMN_2642913	Emp1	0.292129	0.00574935
ILMN_2775300	2410002I01Rik	-0.292069	0.00575974
ILMN_3160783	Ttll4	-0.291958	0.00577913
ILMN_2958076	1110001J03Rik	-0.291851	0.00579791
ILMN_1223317	Lgals3	0.291778	0.00581069
ILMN_2867835	Mif	0.29159	0.00584379
ILMN_2655895	Akt2	-0.291531	0.00585419
ILMN_1254786	Ech1	-0.291521	0.00585599
ILMN_2731237	D8Ertd82e	-0.291284	0.00589819
ILMN_3152663	Gmfg	0.291247	0.00590478
ILMN_2708949	1110032A03Rik	0.291029	0.00594365
ILMN_1248714	Daf1	0.290887	0.0059692
ILMN_1257365	Thra	-0.290869	0.00597249
ILMN_2673980	Hbq1	0.29067	0.00600841
ILMN_1259653	Gng8	0.290652	0.0060116
ILMN_1226607	Cort	0.290223	0.00608985
ILMN_1216538	Bin3	-0.290159	0.00610158
ILMN_2831618	Barx1	-0.290149	0.00610331
ILMN_2473562	Wbscr5	0.290067	0.00611836
ILMN_2915800	Sh2d1b2	0.28993	0.00614367
ILMN_2944366	Hspb8	0.289897	0.00614976
ILMN_1217353	Rfx2	-0.28963	0.00619932
ILMN_2864913	Hhat	0.289584	0.00620788
ILMN_2715840	C1qg	0.289558	0.00621268
ILMN_2932453	P2rx1	0.289505	0.00622264
ILMN_1219820	1200002N14Rik	0.289316	0.00625792
ILMN_1255927	Ubtf	-0.289076	0.00630308
ILMN_1245585	Nkx6-1	0.288941	0.0063288
ILMN_2621812	Myog	0.288819	0.0063519
ILMN_1256514	Dus3l	-0.288728	0.00636922
ILMN_1252512	Magea9	0.288717	0.0063713
ILMN_1250947	Txndc5	0.288596	0.00639442
ILMN_2869110	Comp	0.288548	0.00640354
ILMN_3108372	Mtap6	0.288528	0.00640739
ILMN_2989955	Bmp1	0.288448	0.00642269
ILMN_2871881	Uqcr	-0.28829	0.00645328
ILMN_1226997	Rassf2	0.288096	0.00649067
ILMN_1219978	Dip3b	-0.287881	0.00653255
ILMN_2671829	5730596K20Rik	-0.287601	0.0065873
ILMN_1238140	AU018778	-0.287336	0.00663949
ILMN_2775778	Rcn2	-0.287104	0.00668558
ILMN_1234427	Armc7	0.286907	0.00672487
ILMN_2687032	Fbxo31	-0.286828	0.00674058
ILMN_2918882	Gpnmb	0.286807	0.00674477
ILMN_2859254	Haghl	0.286767	0.00675296
ILMN_2484707	Tyms	0.286658	0.0067747
ILMN_2633212	Cox10	-0.286525	0.00680161
ILMN_2811737	Casp4	0.286525	0.00680169
ILMN_2742426	Selenbp1	-0.286009	0.00690654
ILMN_1251109	AW491445	0.285946	0.00691955
ILMN_1251660	Ccrl1	0.285888	0.00693138
ILMN_1226476	2310004I24Rik	-0.285866	0.00693589
ILMN_2896113	EG545758	-0.285678	0.00697474
ILMN_2472693	Tmeff1	0.28551	0.00700944
ILMN_2680827	Il7r	0.285495	0.00701259
ILMN_1231751	Xpo4	0.285403	0.00703171
ILMN_2907540	Lmcd1	0.285289	0.0070553
ILMN_1216639	Pak3	0.285235	0.00706667
ILMN_2762966	Sn	0.285116	0.00709159
ILMN_1240726	Mmp14	0.285106	0.00709371
ILMN_2691067	Dhdds	-0.285096	0.00709578
ILMN_1233887	Map4k5	0.284984	0.00711928
ILMN_2659052	Ccnb1	0.284957	0.00712493
ILMN_2967266	Fxyd5	0.284853	0.00714695
ILMN_1252176	Tnr	0.284777	0.00716284
ILMN_3163572	Adcy7	0.284586	0.00720351
ILMN_2653081	Prkab1	-0.284558	0.00720946
ILMN_2491202	Vnn3	-0.284357	0.00725225
ILMN_2625148	4632425D07Rik	0.284305	0.00726342
ILMN_2619389	Inpp5f	-0.284229	0.00727976
ILMN_2755666	Apbb1ip	0.284123	0.00730236
ILMN_3118081	1110017D15Rik	-0.283755	0.00738199
ILMN_2742928	Fxyd5	0.283718	0.00739007
ILMN_2896547	E230031K19	-0.283605	0.00741458
ILMN_1251669	Evi2a	0.2836	0.00741564
ILMN_1252057	Fbxo31	-0.283581	0.00741981
ILMN_1253966	Pfkfb2	-0.283562	0.00742408
ILMN_2843698	Smarcal1	-0.283456	0.00744709
ILMN_2916607	Ttc21a	0.283252	0.00749196
ILMN_2659630	Nkx1-2	-0.283157	0.0075129
ILMN_2627566	Capn5	0.283088	0.00752799
ILMN_2606027	Pla2g4a	-0.283048	0.00753699
ILMN_1224716	Armc5	0.282996	0.00754841
ILMN_2736783	Kctd12	0.282952	0.0075581
ILMN_1236125	Mcm6	0.282694	0.00761566
ILMN_2773113	Capg	0.282435	0.00767363
ILMN_1217849	Laptm5	0.282307	0.00770227
ILMN_2713557	4432412D15Rik	0.282086	0.00775243
ILMN_2734969	Eral1	-0.282021	0.00776706
ILMN_2929966	Oas1d	-0.281689	0.00784276
ILMN_2872287	Morc2b	0.281537	0.0078776
ILMN_2644515	Srpx2	0.281489	0.00788869
ILMN_2601215	Cyp7b1	0.281386	0.00791251
ILMN_2699522	Dyrk3	0.281186	0.00795865
ILMN_2763434	Reps2	-0.280797	0.00804955
ILMN_2685516	Hcls1	0.280721	0.00806729
ILMN_2622306	Ank3	-0.280616	0.00809193
ILMN_2677634	Clic5	0.280613	0.00809278
ILMN_2737163	Sqle	0.280489	0.00812204
ILMN_2653765	Nusap1	0.280301	0.00816647
ILMN_1253797	Slit2	0.279924	0.00825626
ILMN_1253813	Hemp1	0.279819	0.00828147
ILMN_2476885	Zadh1	-0.279816	0.00828216
ILMN_1232593	Rbm21	-0.279705	0.00830892
ILMN_1257631	Apobec1	0.279423	0.00837718
ILMN_3091003	Ms4a7	0.279242	0.00842115
ILMN_3059326	Sparc	0.279056	0.00846676
ILMN_2686327	Gas6	0.278518	0.00859944
ILMN_1256564	Ak4	0.278509	0.00860165
ILMN_2738090	D7Ertd743e	0.278446	0.00861727
ILMN_2710312	2610524G07Rik	0.278016	0.00872474
ILMN_1251401	Slc22a12	-0.277978	0.00873433
ILMN_2977492	Moxd1	0.27753	0.00884791
ILMN_1221418	A230062G08Rik	-0.27736	0.0088913
ILMN_2688763	Ndufs7	-0.2773	0.00890667
ILMN_1224132	Olfr484	0.277144	0.00894666
ILMN_2469090	Wnt1	-0.277056	0.0089692
ILMN_2751619	Bloc1s3	0.277055	0.00896942
ILMN_2440530	Vat1	0.276909	0.00900728
ILMN_1213405	4930488L10Rik	0.276852	0.00902192
ILMN_1215401	Zfp87	0.276634	0.00907854
ILMN_2599917	9530053A07Rik	-0.276598	0.00908807
ILMN_2520592	Zfh4	0.276513	0.00911025
ILMN_1236161	Slc10a3	0.276033	0.0092363
ILMN_2752095	Gabt4	-0.276028	0.00923759
ILMN_2675433	Snapc4	-0.275932	0.00926312
ILMN_2709787	D130059P03Rik	-0.275447	0.00939249
ILMN_2745555	Mrps21	-0.275135	0.0094766
ILMN_2982662	Tmem45a	0.27494	0.00952929
ILMN_1246266	Cd79a	-0.274917	0.00953561
ILMN_2593188	Egfl8	0.27491	0.00953757
ILMN_2747331	2400010D15Rik	-0.274879	0.00954603
ILMN_2595908	Mmp19	0.27477	0.00957573
ILMN_3058780	Rims1	0.274672	0.0096024
ILMN_1231166	Tm7sf4	0.274587	0.00962586
ILMN_2713240	Tas2r131	0.274477	0.00965601
ILMN_3023230	Jmjd3	-0.274299	0.00970497
ILMN_2728928	Fabp1	-0.274293	0.00970652
ILMN_1237627	Rad9	-0.274163	0.00974259
ILMN_3122480	Zdhhc19	0.273963	0.00979805
ILMN_2589768	Htr2b	0.273726	0.00986446
ILMN_2652112	Slc22a19	0.273695	0.00987313
ILMN_2707207	1110011D13Rik	-0.273642	0.00988796
ILMN_1247261	Galc	0.273606	0.00989788
ILMN_3067068	Tmsb10	0.273542	0.00991599
ILMN_1220086	2310016N21Rik	-0.273498	0.00992829
ILMN_2536080	LOC382864	0.27342	0.00995033
ILMN_2627895	Etfb	-0.273395	0.00995741
ILMN_2474887	Whsc2	-0.273381	0.00996149
ILMN_2996916	OTTMUSG00000000514	-0.273359	0.00996766
ILMN_2733683	Cysltr2	0.273343	0.00997209
ILMN_1237381	V1ri6	-0.273225	0.0100057
ILMN_2735102	Mylip	-0.273187	0.0100164
ILMN_1218196	Il17rd	0.272977	0.0100761
ILMN_2862379	Rhod	0.272906	0.0100964
ILMN_2950837	Mfn1	-0.272859	0.0101097
ILMN_2753809	Mmp3	0.272721	0.0101495
ILMN_2726941	4930418G15Rik	-0.272701	0.0101553
ILMN_2975500	Il7r	0.272407	0.01024
ILMN_2991722	Taar7d	-0.272345	0.0102579
ILMN_1229593	Ddef1	-0.272201	0.0102998
ILMN_3136369	Pard3	-0.272164	0.0103104
ILMN_1255776	BC017643	0.272043	0.0103458
ILMN_1240735	2610009I02Rik	-0.271812	0.0104134
ILMN_1238893	2810038K19Rik	-0.271678	0.0104527
ILMN_2753988	Rtkn	0.271364	0.0105458
ILMN_1226183	Antxr1	0.271354	0.0105488
ILMN_2632571	Il28ra	-0.271353	0.0105489
ILMN_1239430	Mrc1	0.271133	0.0106147
ILMN_2718453	Arid5a	-0.271104	0.0106231
ILMN_2908855	Gnai2	0.271095	0.010626
ILMN_1239525	Polr2j	-0.270919	0.0106787
ILMN_2458587	Zfp592	-0.270872	0.0106928
ILMN_2677157	Npff	-0.270574	0.0107825
ILMN_2610424	Myt1l	-0.27049	0.010808
ILMN_2699451	Ppp1r7	0.270393	0.0108376
ILMN_2798753	Gnl2	-0.270386	0.0108398
ILMN_2417824	Vipr1	-0.270328	0.0108573
ILMN_2509962	Zfp276	-0.270321	0.0108595
ILMN_1222111	Col15a1	0.270256	0.0108792
ILMN_2653725	Inhbb	0.27017	0.0109057
ILMN_1230708	BC049354	0.270134	0.0109165
ILMN_2939424	Atp6ap2	0.270045	0.0109437
ILMN_2739637	Olfr693	-0.270002	0.0109569
ILMN_2987161	Cnot3	-0.269827	0.0110108
ILMN_2653808	Taf1c	-0.26981	0.0110161
ILMN_2599292	Cabp7	0.269637	0.0110697
ILMN_2631775	Olfr894	0.269602	0.0110803
ILMN_2704927	AI480653	0.269556	0.0110947
ILMN_1251839	Myo7a	0.26937	0.0111526
ILMN_3009334	Ncaph2	-0.269117	0.0112316
ILMN_2704499	Hprt	0.269114	0.0112327
ILMN_2772077	Bok	0.269093	0.0112394
ILMN_3161191	Olfr1222	-0.269081	0.0112429
ILMN_1236716	1200016B10Rik	-0.269064	0.0112484
ILMN_2944988	Lipn	0.269036	0.011257
ILMN_3012253	Armcx6	0.269003	0.0112677
ILMN_1259252	Anxa1	0.268974	0.0112768
ILMN_2796089	Anapc13	-0.268971	0.0112776
ILMN_1228295	Krt2-6a	-0.268937	0.0112882
ILMN_1231138	E2f1	0.268856	0.0113138
ILMN_2640239	Pqlc3	0.268645	0.0113807
ILMN_1220475	Faf1	0.268595	0.0113967
ILMN_2800070	Insrr	0.268444	0.0114445
ILMN_3113787	Grap2	-0.2684	0.0114585
ILMN_2736723	Pkd1l3	-0.268292	0.0114933
ILMN_2589057	Timd4	-0.268253	0.0115056
ILMN_3001415	Cypt8	-0.268201	0.0115224
ILMN_2768252	Myl7	-0.268163	0.0115345
ILMN_1229643	Antxr1	0.268145	0.0115403
ILMN_1239843	Clecsf12	0.268094	0.0115567
ILMN_1228564	Gucy1a3	0.268039	0.0115744
ILMN_2766455	Lrrc5	0.267732	0.0116738
ILMN_1248672	Slc6a7	0.267706	0.0116821
ILMN_1228590	5730405M13Rik	0.267614	0.011712
ILMN_2867147	Tyrobp	0.267583	0.011722
ILMN_3160688	Zfp597	-0.267472	0.0117584
ILMN_1239270	Inha	-0.267408	0.0117792
ILMN_2703093	Rpgr	0.26705	0.0118969
ILMN_1254705	Atp5d	-0.267035	0.0119019
ILMN_2689426	1110037P11Rik	-0.267017	0.0119079
ILMN_3125966	Kcnj15	0.266908	0.0119439
ILMN_3162117	Olfr452	0.266845	0.0119646
ILMN_2738224	L3mbtl3	0.266766	0.0119908
ILMN_2734848	Brd2	-0.266643	0.0120317
ILMN_2765936	5730472N09Rik	-0.266637	0.0120337
ILMN_1250435	1700029G01Rik	-0.266572	0.0120555
ILMN_3136542	Gcdh	-0.266549	0.0120632
ILMN_2681212	Efnb3	-0.266475	0.012088
ILMN_2706226	Olfr811	-0.266372	0.0121223
ILMN_1253317	Xpnpep1	0.266277	0.0121543
ILMN_2656489	1700091F14Rik	-0.266221	0.0121732
ILMN_2825020	Rassf5	0.266185	0.0121853
ILMN_2605512	Lamb3	-0.266168	0.0121909
ILMN_2840985	St6galnac5	0.2661	0.0122139
ILMN_2830060	Wfdc10	0.265779	0.0123227
ILMN_2803249	Inmt	-0.265738	0.0123365
ILMN_2750089	Slc38a3	-0.265618	0.0123775
ILMN_2692914	D14Ertd581e	0.265562	0.0123967
ILMN_2628174	Acas2l	-0.265325	0.012478
ILMN_2758418	6330500D04Rik	-0.265242	0.0125066
ILMN_2693403	Ela1	0.265211	0.0125173
ILMN_2589902	Olfr604	0.265125	0.012547
ILMN_1227596	Pmvk	-0.265085	0.0125609
ILMN_2817714	Tspan17	0.264883	0.0126308
ILMN_2699096	Accn3	-0.264783	0.0126656
ILMN_1224551	C030046I01Rik	0.264684	0.0127002
ILMN_2704500	Olfr635	0.264641	0.012715
ILMN_2717777	Polrmt	-0.264597	0.0127305
ILMN_2840286	Megf10	0.264435	0.0127873
ILMN_1253791	Kcnv2	-0.264353	0.0128163
ILMN_1214167	Commd10	0.264249	0.0128527
ILMN_2738031	AA408296	-0.26418	0.0128772
ILMN_3077630	Kbtbd7	-0.264138	0.0128921
ILMN_3093817	Shprh	-0.2641	0.0129055
ILMN_3151570	4931433A13Rik	0.264004	0.0129395
ILMN_1253491	Abcc9	-0.263987	0.0129454
ILMN_1231387	BC013491	-0.263978	0.0129487
ILMN_1249635	Leprel1	0.263928	0.0129666
ILMN_2593034	C1qtnf3	0.263914	0.0129715
ILMN_2798400	Lcat	-0.263905	0.0129745
ILMN_2861469	Cyfip1	0.263835	0.0129996
ILMN_2726837	Nppb	0.263818	0.0130057
ILMN_2449917	Tyro3	-0.263666	0.0130599
ILMN_1213736	6330406I15Rik	0.263563	0.0130968
ILMN_2657175	Anxa2	0.263554	0.0131001
ILMN_2654754	Gp38	0.263479	0.0131271
ILMN_2654314	Kif1b	-0.263454	0.0131361
ILMN_2654442	Kbtbd2	-0.263381	0.0131624
ILMN_3161013	Hk3	0.263231	0.0132164
ILMN_2728706	Abca4	-0.263182	0.0132342
ILMN_2975718	Rps6ka1	0.263181	0.0132344
ILMN_1239742	Atp2a2	-0.263151	0.0132455
ILMN_2714360	Cd34	0.263145	0.0132474
ILMN_2749448	AI840980	0.263145	0.0132475
ILMN_2701332	E230026N22Rik	0.262872	0.0133468
ILMN_2823796	Mtf2	-0.262843	0.0133571
ILMN_2515601	Vldlr	-0.262763	0.0133865
ILMN_1251056	Lsm6	0.262748	0.013392
ILMN_1224380	Gosr2	0.262704	0.0134081
ILMN_2588995	Rab8b	0.262677	0.0134178
ILMN_2708527	5730421E18Rik	-0.262593	0.0134486
ILMN_2751822	Dsg1b	0.262523	0.0134743
ILMN_1221608	Adam21	0.262517	0.0134767
ILMN_1233969	Akap1	0.262453	0.0135003
ILMN_1232589	Kin	-0.262392	0.0135226
ILMN_2760979	Tgfbr2	0.262336	0.0135432
ILMN_2719418	1110051B16Rik	0.262326	0.013547
ILMN_2515363	Tpm4	0.262265	0.0135697
ILMN_2543107	Osm	0.262217	0.0135874
ILMN_1241602	Rds	-0.262199	0.0135942
ILMN_2659426	Cxcl14	0.262196	0.013595
ILMN_2847787	Emr1	0.262196	0.0135953
ILMN_3072117	Ric3	0.262168	0.0136056
ILMN_1257575	Cst3	0.262104	0.0136292
ILMN_2984793	1500001M20Rik	-0.262036	0.0136547
ILMN_2837816	Gnmt	-0.26201	0.0136641
ILMN_2602711	Tgfbr1	0.262008	0.0136649
ILMN_2825391	Mobkl2c	0.261834	0.0137299
ILMN_1216660	9930021J17Rik	-0.261675	0.0137893
ILMN_2595593	Fxyd3	0.261505	0.0138531
ILMN_2840818	Cmpk	0.261441	0.0138773
ILMN_3161878	Bid	0.261273	0.0139407
ILMN_1226263	Polr2c	0.261174	0.0139785
ILMN_1226133	Dgcr8	0.26108	0.0140142
ILMN_2714849	Crhr1	-0.261017	0.0140381
ILMN_3040069	Hist2h3c1	0.260919	0.0140756
ILMN_2839588	Tbcc	0.260691	0.0141626
ILMN_1240624	1700011H14Rik	-0.260632	0.0141854
ILMN_1257893	4921511C20Rik	-0.260627	0.0141873
ILMN_2672662	Fastk	-0.260582	0.0142045
ILMN_1217567	3110004H13Rik	-0.260461	0.0142512
ILMN_1229745	Sertad4	0.260338	0.0142987
ILMN_1246841	Relb	0.260323	0.0143045
ILMN_2617318	Lrfn5	0.260076	0.0144005
ILMN_2642517	6330406I15Rik	0.260012	0.0144254
ILMN_2723718	Rcn3	0.259958	0.0144465
ILMN_1226447	Sema4b	-0.259778	0.0145171
ILMN_2725188	Atp10a	0.259712	0.0145427
ILMN_2718929	BC042698	0.259687	0.0145526
ILMN_2892856	Rnf167	-0.259607	0.014584
ILMN_2881681	Tnrc6c	-0.259586	0.0145926
ILMN_2657210	Hey2	-0.259539	0.014611
ILMN_2710773	2610528O22Rik	-0.259494	0.0146287
ILMN_2595792	Coro6	-0.259265	0.0147195
ILMN_1244695	3110032G18Rik	0.259222	0.0147365
ILMN_2803399	Mcm6	0.25922	0.0147375
ILMN_1253486	Eya2	-0.259145	0.0147672
ILMN_1216882	Postn	0.259138	0.01477
ILMN_2657510	2810417D08Rik	0.259113	0.01478
ILMN_2867927	Zfr	0.259062	0.0148001
ILMN_2612915	Kcnn3	-0.25898	0.0148329
ILMN_2591469	Rhebl1	-0.258734	0.0149313
ILMN_2670001	Cd248	0.258716	0.0149389
ILMN_2615513	Frk	0.258521	0.0150171
ILMN_2645989	6330416L07Rik	-0.2582	0.0151474
ILMN_2468276	Ube4a	-0.258135	0.0151737
ILMN_2701562	2610103J23Rik	0.257991	0.0152325
ILMN_2759828	4732406D01Rik	-0.257949	0.0152496
ILMN_1230145	Acvr2b	-0.2579	0.0152701
ILMN_2967302	OTTMUSG00000015643	-0.257665	0.0153665
ILMN_2638487	Eya1	-0.257662	0.0153677
ILMN_2727520	Cox8b	-0.257639	0.0153773
ILMN_1228585	Ncf1	0.2575	0.0154346
ILMN_1377920	Eef1a1	0.257408	0.0154725
ILMN_2687586	Cxcl16	0.257219	0.0155513
ILMN_2810882	Ppic	0.257182	0.0155665
ILMN_2612206	Cdc20	0.25706	0.0156175
ILMN_2720389	Hs6st2	0.257032	0.0156291
ILMN_1216883	1300006N24Rik	-0.256996	0.0156442
ILMN_1245307	Fbln2	0.25691	0.0156802
ILMN_2719513	Slc39a8	-0.256888	0.0156895
ILMN_2694842	Aoc2	-0.25668	0.0157767
ILMN_1214483	Crabp2	0.256677	0.015778
ILMN_2632389	Fbxo22	-0.256536	0.0158375
ILMN_1227900	Il12rb1	-0.256535	0.015838
ILMN_2733356	2310067E08Rik	0.256505	0.0158509
ILMN_2947234	Cbx7	-0.256424	0.0158849
ILMN_2689785	Cd68	0.256378	0.0159048
ILMN_2702208	Card15	-0.256268	0.0159514
ILMN_3067831	Zfp187	-0.256026	0.0160545
ILMN_3036891	Brsk2	-0.25596	0.016083
ILMN_2503420	Zfp617	0.25595	0.0160873
ILMN_1253409	Kcnj8	-0.255865	0.0161235
ILMN_2703618	Dvl3	-0.255769	0.016165
ILMN_2790241	Herpud1	-0.255721	0.0161854
ILMN_2616926	Slc24a2	0.255698	0.0161957
ILMN_2700505	Tmem43	0.255682	0.0162022
ILMN_1224434	2610103J23Rik	0.255569	0.016251
ILMN_2677449	Cacna1c	-0.25552	0.0162722
ILMN_3058137	Mgat1	-0.255451	0.0163023
ILMN_1227153	Krt82	-0.255383	0.0163319
ILMN_2750801	Rpa1	-0.255356	0.0163435
ILMN_2595163	Mpp2	-0.255352	0.016345
ILMN_3162403	St6galnac3	0.25528	0.0163766
ILMN_1253171	Edem1	0.255202	0.0164103
ILMN_3086919	4930408O21Rik	0.2552	0.0164114
ILMN_2753492	Ripk1	0.25515	0.0164333
ILMN_1230586	Traf1	0.25502	0.01649
ILMN_1249046	Cmtm8	-0.254883	0.01655
ILMN_2673599	Actn4	0.254849	0.016565
ILMN_1253593	Zfp537	0.254809	0.0165826
ILMN_1214486	Tk2	0.254626	0.0166632
ILMN_2749037	Ndg2	-0.254531	0.0167055
ILMN_1250815	Wsb1	0.254474	0.0167307
ILMN_1218264	Vldlr	-0.254252	0.0168293
ILMN_3140913	A630005A06Rik	0.254174	0.0168642
ILMN_2785104	Sfrs7	-0.254165	0.0168679
ILMN_2768674	Sap18	-0.254123	0.0168867
ILMN_3015864	Prickle2	0.253964	0.0169582
ILMN_1247080	C130053K05Rik	-0.253932	0.0169722
ILMN_2765989	Otub2	0.253927	0.0169748
ILMN_2804622	Med25	-0.253904	0.016985
ILMN_2680770	Cysltr1	0.253856	0.0170067
ILMN_2635232	Rab6ip1	0.253779	0.0170413
ILMN_1241795	5330440M15Rik	-0.253656	0.0170968
ILMN_2603401	Epyc	-0.253625	0.0171108
ILMN_2798402	Lcat	-0.2536	0.0171222
ILMN_1215890	Creb1	-0.253585	0.0171286
ILMN_1245609	Sgpl1	0.253498	0.0171683
ILMN_1230893	Farp1	0.253478	0.0171772
ILMN_2964522	Edg5	0.252969	0.0174093
ILMN_3156633	Kbtbd7	-0.252955	0.0174157
ILMN_2659950	Echdc1	-0.252918	0.0174331
ILMN_2979824	Rgs5	-0.252917	0.0174333
ILMN_2593425	Cnot3	-0.252901	0.0174407
ILMN_2840430	BC029169	0.252885	0.0174481
ILMN_3144535	Dmrtc1a	0.25283	0.0174732
ILMN_2889482	Sox7	-0.252764	0.0175039
ILMN_2460653	Unc93b1	0.252753	0.0175086
ILMN_2867901	Cdc20	0.252713	0.0175273
ILMN_3001322	Tmem119	0.252594	0.0175821
ILMN_3160926	Calm5	-0.252481	0.0176347
ILMN_1256412	Sh2bpsm1	-0.252397	0.0176735
ILMN_1241225	Dctd	0.252396	0.0176741
ILMN_3111685	Acsm3	-0.252284	0.017726
ILMN_2656827	Bcat1	0.25221	0.0177605
ILMN_2749303	Ddx20	-0.251946	0.0178841
ILMN_1252910	Pou5f1	0.25187	0.0179202
ILMN_1212894	Cask	0.251785	0.0179599
ILMN_2937282	Zfp711	-0.251781	0.017962
ILMN_2723576	Cldn10	-0.251756	0.0179739
ILMN_2662191	Oplah	-0.251755	0.0179743
ILMN_2692258	Emilin3	0.251711	0.0179949
ILMN_2970715	Klk5	-0.251603	0.0180458
ILMN_1256927	2310040C09Rik	0.251564	0.0180643
ILMN_2597314	Col9a3	0.251508	0.0180908
ILMN_2764588	Igfbp7	0.251463	0.0181125
ILMN_2711772	A930021H16Rik	0.251432	0.0181273
ILMN_2719097	A2bp1	-0.251422	0.0181316
ILMN_2637389	Olfr810	0.251415	0.0181352
ILMN_2728091	Slc7a1	-0.251341	0.0181704
ILMN_1242013	Uck2	0.251336	0.0181728
ILMN_2726271	Arr3	-0.251335	0.0181733
ILMN_2904819	9530058B02Rik	-0.251318	0.0181815
ILMN_2819650	Tfpi	-0.251266	0.0182059
ILMN_2752737	Prosapip1	0.251114	0.0182787
ILMN_1248780	Sprr2b	-0.251066	0.0183015
ILMN_2749471	Fut8	0.250971	0.018347
ILMN_1220498	Pygm	-0.2509	0.0183815
ILMN_2656422	BC028528	0.250823	0.0184183
ILMN_3006767	Mlkl	0.250723	0.0184667
ILMN_2681241	Birc5	0.250698	0.0184788
ILMN_3024592	Zfx	-0.250621	0.0185159
ILMN_2671794	4631403P03Rik	-0.250607	0.0185228
ILMN_2508745	Zfyve21	-0.250581	0.0185351
ILMN_2706531	Gm1010	-0.250576	0.0185379
ILMN_3009747	Serpinb3d	-0.250553	0.018549
ILMN_3137291	Lif	-0.250526	0.018562
ILMN_2682632	Mapkapk5	0.25051	0.0185698
ILMN_3064669	Mapk1ip1	-0.250263	0.0186898
ILMN_2859978	Papss1	0.250172	0.0187341
ILMN_2588882	Slc41a2	0.250065	0.0187868
ILMN_1248018	Foxn4	-0.250047	0.0187955
ILMN_2910194	Zbtb40	-0.249996	0.0188202
ILMN_1244123	Slc38a2	-0.249866	0.0188841
ILMN_3161951	LOC432838	0.24984	0.0188972
ILMN_2989312	Gdap1l1	0.249824	0.0189048
ILMN_3107607	Rab6ip1	0.249725	0.0189538
ILMN_2731310	Dsc2	-0.249674	0.0189789
ILMN_3075113	4933435A13Rik	0.249399	0.0191151
ILMN_2655577	Pold1	-0.249091	0.019269
ILMN_1226545	4933437F05Rik	-0.249078	0.0192753
ILMN_3110679	Gats	0.249063	0.0192829
ILMN_1254788	Gps1	0.249037	0.0192959
ILMN_2655144	2400010G15Rik	-0.248961	0.0193344
ILMN_1212619	4933428A15Rik	0.248772	0.019429
ILMN_1248843	Gata3	-0.248591	0.0195205
ILMN_2629500	EG328354	-0.248525	0.0195543
ILMN_3163424	1700120B06Rik	-0.248493	0.0195705
ILMN_2820127	Krt83	0.248485	0.0195742
ILMN_2716497	Ccne1	0.248425	0.0196047
ILMN_2786160	Arhgap1	0.248404	0.0196155
ILMN_2729015	BC049816	0.248367	0.0196346
ILMN_1219244	Elmo3	-0.248366	0.0196347
ILMN_2784392	Rhox8	-0.248046	0.0197983
ILMN_2769918	Timp1	0.24789	0.0198786
ILMN_1217040	1300001I01Rik	-0.247833	0.0199077
ILMN_2509171	Trim17	0.247819	0.0199149
ILMN_2610744	Myl4	-0.247551	0.0200535
ILMN_2534125	LOC380691	0.247516	0.0200712
ILMN_1254179	Rap2b	0.247431	0.0201158
ILMN_2877069	Tspo	0.247396	0.0201337
ILMN_2927025	Sdcbp	0.247166	0.0202536
ILMN_2959291	Upp1	0.247164	0.0202546
ILMN_1240536	1700065I17Rik	-0.246992	0.0203446
ILMN_3113303	Atp2b2	0.246861	0.0204135
ILMN_1239463	Snf1lk	-0.246836	0.0204268
ILMN_3136416	LOC627200	-0.246792	0.0204497
ILMN_1249347	Uxt	-0.24678	0.0204563
ILMN_2714195	Ugt2a3	0.246605	0.0205484
ILMN_1228635	Pum2	0.246497	0.0206058
ILMN_1222489	Sulf1	0.246411	0.0206512
ILMN_2678336	Ctf1	-0.246367	0.020675
ILMN_2424721	Pdgfa	-0.246326	0.0206965
ILMN_1255033	Fbn2	0.246316	0.0207022
ILMN_1247676	Cst6	0.246239	0.0207429
ILMN_2488846	Tmod4	-0.246216	0.0207553
ILMN_2588601	Ndufa2	-0.246159	0.0207859
ILMN_2759398	Adam22	-0.246149	0.0207912
ILMN_2593927	AW456874	-0.246145	0.0207931
ILMN_2588052	Eef1a1	0.246144	0.0207937
ILMN_3128478	Alx3	0.24613	0.0208012
ILMN_2699477	Abtb1	-0.246113	0.0208104
ILMN_1237670	Entpd2	0.246107	0.0208136
ILMN_2519451	4733401H18Rik	0.246024	0.0208579
ILMN_1218226	2210413P12Rik	0.246005	0.0208679
ILMN_3161495	Olfr804	-0.245881	0.0209345
ILMN_2676127	Scarf2	0.245786	0.0209857
ILMN_2755352	Olfr1228	-0.245738	0.0210115
ILMN_3162365	A130028J20Rik	0.245721	0.0210208
ILMN_2686348	Pknox2	0.245675	0.0210459
ILMN_1255497	Sds	-0.245584	0.0210948
ILMN_2968211	Lgals4	-0.245542	0.0211176
ILMN_3160773	Olfr298	0.245419	0.0211845
ILMN_2880906	Pdlim2	0.245294	0.0212523
ILMN_2647458	1700007I06Rik	0.24517	0.0213198
ILMN_1229977	Cutl1	-0.245163	0.0213235
ILMN_3080371	Fert2	-0.245142	0.0213352
ILMN_1256378	D430025H09Rik	0.245121	0.0213465
ILMN_2942989	Mtpn	0.244918	0.0214578
ILMN_2424299	Tnfrsf12a	0.244814	0.0215152
ILMN_2872879	Dpcr1	0.244807	0.0215189
ILMN_1257794	Nr4a3	-0.244795	0.0215255
ILMN_1245758	Csnk1g1	-0.244714	0.0215703
ILMN_3101339	Kcnmb4	-0.244595	0.021636
ILMN_2875550	Olfr630	-0.244571	0.0216489
ILMN_2439638	Traf3	0.244565	0.0216525
ILMN_2789077	Itgb1	0.244497	0.0216901
ILMN_3073486	Rpl31	0.244461	0.02171
ILMN_2782177	Olfr995	-0.24444	0.0217218
ILMN_3161480	Fcmd	-0.244435	0.0217244
ILMN_1218268	LOC239526	0.244411	0.0217378
ILMN_2713285	Fhl1	0.244359	0.0217669
ILMN_2826161	Taf12	-0.244283	0.0218092
ILMN_2671923	Ly86	0.24426	0.0218215
ILMN_1254554	1110007A06Rik	-0.244169	0.0218726
ILMN_2729422	Ror2	0.244137	0.0218903
ILMN_1251414	Nxf	-0.244092	0.0219156
ILMN_2947005	Olfr20	-0.244074	0.0219257
ILMN_2714936	Mki67ip	0.244033	0.0219484
ILMN_1224012	Aldob	-0.244023	0.0219543
ILMN_3125920	Mast2	-0.243929	0.0220068
ILMN_2697220	Figf	0.243902	0.0220219
ILMN_2860479	Arpc1b	0.243789	0.0220852
ILMN_2929896	Pbk	0.243716	0.0221266
ILMN_3033753	Fndc5	-0.243706	0.022132
ILMN_1241332	Mamdc1	-0.243605	0.0221892
ILMN_2672845	Slco6c1	-0.243528	0.0222329
ILMN_2829295	Mrps31	-0.243442	0.0222813
ILMN_2755322	Atp6v1e2	0.243393	0.0223091
ILMN_3162214	Hemt1	0.243303	0.0223605
ILMN_1242352	Acp6	-0.243246	0.0223927
ILMN_3107059	Espn	-0.24324	0.0223964
ILMN_1240598	BC034054	0.243233	0.0224
ILMN_2933982	4930449I24Rik	-0.24322	0.0224073
ILMN_2886194	Tmprss5	-0.243118	0.0224659
ILMN_2730424	9430041C03Rik	-0.243077	0.0224891
ILMN_2843403	2610019P18Rik	0.242999	0.0225339
ILMN_1217728	Jph1	-0.242817	0.0226381
ILMN_1237642	D030051N19Rik	-0.242801	0.0226476
ILMN_2642480	Tas2r130	0.242698	0.0227065
ILMN_2654651	Thbs3	0.242674	0.0227207
ILMN_2969032	Spred2	0.242651	0.0227341
ILMN_2867960	Olfr1328	0.242633	0.0227439
ILMN_2651077	Scotin	0.242624	0.0227493
ILMN_3160444	Sval3	0.242587	0.0227706
ILMN_2664049	Mrpl38	-0.242528	0.0228047
ILMN_2604282	Sfrp1	0.242524	0.0228069
ILMN_2590164	Cadps2	0.242491	0.0228261
ILMN_2833703	Slc26a9	0.242348	0.0229089
ILMN_2780280	Klk11	-0.242341	0.0229134
ILMN_2879746	Lasp1	0.242262	0.0229589
ILMN_2918440	Aarsd1	-0.242144	0.023028
ILMN_2802711	Rbm24	-0.242137	0.0230317
ILMN_1256776	V1rg8	0.24212	0.023042
ILMN_2921638	C230097I24Rik	0.242068	0.0230723
ILMN_2671707	Gpr77	0.242063	0.0230751
ILMN_2616389	Pax8	-0.24204	0.0230885
ILMN_1246983	Syt14l	-0.241998	0.0231133
ILMN_2757092	Hint3	-0.241951	0.0231408
ILMN_2755021	Chkb	-0.241854	0.0231978
ILMN_2819112	Ang4	0.241722	0.0232749
ILMN_2934532	Prpf19	-0.241571	0.0233642
ILMN_2888742	Ntan1	0.241442	0.0234402
ILMN_1233351	Ocm	0.241402	0.0234641
ILMN_1212938	Aif1	0.241401	0.0234649
ILMN_2842783	EG547109	-0.241342	0.0234996
ILMN_3145415	Cstf3	0.241336	0.0235029
ILMN_2451022	Vim	0.241327	0.0235085
ILMN_1232458	C1qtnf2	0.2413	0.0235243
ILMN_1234223	AI132321	0.241253	0.0235522
ILMN_2713538	Bmp1	0.241119	0.0236323
ILMN_1237204	Olfr341	0.241069	0.023662
ILMN_3008497	Tbc1d10b	0.240848	0.0237941
ILMN_1220793	4921506I22Rik	-0.240807	0.023819
ILMN_1250747	Pex12	-0.240799	0.0238239
ILMN_3129849	Nkx2-2	0.240771	0.0238404
ILMN_2609323	Lst1	0.240696	0.0238854
ILMN_2612564	AA408296	-0.240629	0.0239261
ILMN_2664788	1700006H02Rik	-0.24062	0.0239313
ILMN_2849449	Itga5	0.240468	0.0240229
ILMN_2904703	Ctsl	0.240419	0.0240529
ILMN_2822552	Ubtd2	0.24037	0.0240825
ILMN_2844032	Itga11	0.240368	0.0240838
ILMN_2628822	Oas1g	0.240317	0.0241143
ILMN_2790097	Rhoc	0.2403	0.0241246
ILMN_3073406	Slc16a6	0.240221	0.0241728
ILMN_2680038	1200013B22Rik	0.240173	0.0242018
ILMN_2910596	Pold4	0.240162	0.0242086
ILMN_1225594	1110008P14Rik	0.240124	0.0242316
ILMN_2593038	Rxrb	-0.240097	0.0242482
ILMN_1256423	C130037N17Rik	-0.240047	0.0242787
ILMN_2633333	Brd4	-0.239899	0.0243689
ILMN_2634702	Ift81	-0.239823	0.024416
ILMN_1213456	Dhrs7	-0.239756	0.0244571
ILMN_2611450	Ift172	-0.239755	0.0244574
ILMN_2781784	Osr2	-0.23971	0.0244852
ILMN_2844820	Angptl7	0.239674	0.0245075
ILMN_2768638	BC020077	0.239656	0.0245184
ILMN_2647931	Cdyl	-0.23965	0.024522
ILMN_2476329	Whrn	-0.239625	0.0245374
ILMN_2600218	5730536A07Rik	-0.23955	0.0245833
ILMN_1239181	1110025F24Rik	0.239497	0.0246163
ILMN_2706061	Sfpq	-0.239422	0.0246624
ILMN_2740391	Mt4	0.239416	0.0246665
ILMN_2945275	Rbm15	-0.239208	0.0247952
ILMN_2638850	Brunol4	0.239184	0.0248104
ILMN_2775962	2310010P21Rik	-0.239132	0.0248423
ILMN_1255216	Hsf1	-0.239101	0.0248618
ILMN_2665301	Dixdc1	0.238912	0.0249798
ILMN_2662184	Chrnd	0.23885	0.0250182
ILMN_2814484	Ifitm1	-0.238739	0.0250879
ILMN_2588631	Gprc2a	0.238722	0.0250984
ILMN_2738739	Tacc2	-0.238592	0.0251804
ILMN_3074259	Lamp2	0.238566	0.0251968
ILMN_1250975	Atf7	-0.238496	0.0252407
ILMN_2698880	Slc35f3	-0.238357	0.0253283
ILMN_2730704	Olfr919	-0.238355	0.0253302
ILMN_2943476	Lcmt1	-0.23834	0.0253393
ILMN_3114413	G3bp2	0.238312	0.0253571
ILMN_2722659	Clps	-0.238177	0.0254425
ILMN_2763839	Dlgh1	-0.238138	0.0254677
ILMN_2598571	5930405J04Rik	-0.238071	0.0255097
ILMN_2648618	Arfgap3	0.23801	0.0255489
ILMN_2765196	Camk2g	0.238003	0.0255534
ILMN_3103896	Timp1	0.237947	0.025589
ILMN_2870913	EG432743	0.237812	0.0256756
ILMN_2626235	Lgals4	-0.237808	0.0256778
ILMN_2756762	Strc	-0.237666	0.0257685
ILMN_1236096	Matn3	0.237411	0.0259329
ILMN_2863849	C1qtnf3	0.237394	0.0259437
ILMN_2696232	Nme5	-0.237385	0.02595
ILMN_2619505	Dnajc5b	-0.237203	0.0260675
ILMN_1246591	Nsddr	-0.237089	0.0261413
ILMN_2961091	Slc29a3	0.237074	0.0261509
ILMN_2658804	Rras	0.237054	0.0261639
ILMN_1256080	Tulp2	-0.237016	0.0261891
ILMN_1218393	Rac3	0.237007	0.0261948
ILMN_2640570	Pak4	0.236916	0.0262537
ILMN_2933834	Mib1	0.236868	0.0262855
ILMN_1251492	Krtcap1	-0.236863	0.0262884
ILMN_2710819	Csf1r	0.236837	0.0263053
ILMN_1246517	Klra17	0.236788	0.0263379
ILMN_2635738	Atp8a2	0.236783	0.0263408
ILMN_1225728	Olfr295	0.236769	0.0263499
ILMN_2650275	1810055G02Rik	0.23675	0.0263623
ILMN_2457585	Trp53inp2	0.236746	0.0263649
ILMN_2888181	Echs1	-0.236706	0.026391
ILMN_2874507	Rpl4	0.236705	0.0263917
ILMN_2875404	Nrip3	0.236688	0.0264027
ILMN_1247220	Tbx3	-0.236681	0.0264076
ILMN_1252870	Rorb	0.236662	0.02642
ILMN_2763002	Eno2	0.236576	0.0264764
ILMN_1233067	Rgs20	-0.236574	0.0264775
ILMN_2729588	Sytl3	0.236533	0.0265048
ILMN_2738638	Gja9	0.236423	0.0265768
ILMN_2629030	2310041H06Rik	0.236411	0.0265847
ILMN_3091288	Tpd52	0.236336	0.0266342
ILMN_2534526	LOC238011	0.236239	0.0266985
ILMN_2710266	BC049702	-0.236185	0.026734
ILMN_2759563	2410008K03Rik	0.236114	0.0267816
ILMN_2693922	Egfr	0.236071	0.0268098
ILMN_2847230	Cbx3	0.236	0.0268569
ILMN_2724942	Ptgis	0.235991	0.0268628
ILMN_2727980	AA415817	0.235984	0.0268676
ILMN_2965660	Apcdd1	0.235942	0.0268959
ILMN_2453946	V1rd20	-0.235858	0.0269518
ILMN_2695316	Asb7	0.235825	0.0269733
ILMN_2641484	Rab9	0.235804	0.0269873
ILMN_2635167	Csrp2bp	-0.23568	0.0270705
ILMN_3135284	Zfp606	-0.235564	0.0271479
ILMN_2707541	Folr1	0.235477	0.0272065
ILMN_2641816	1110021N19Rik	-0.235402	0.0272569
ILMN_2729882	Sycp3	-0.235319	0.027313
ILMN_2908133	Gja5	-0.235223	0.0273776
ILMN_2481799	Zfp75	-0.234938	0.0275708
ILMN_2636005	4632411J06Rik	0.23488	0.0276106
ILMN_2652845	Odz1	-0.234873	0.0276148
ILMN_1232601	Cyb561	0.234821	0.0276505
ILMN_2600236	4933430J11	-0.234748	0.0277001
ILMN_1232800	Cyfip2	-0.234745	0.0277021
ILMN_2626153	Fbln2	0.23474	0.027706
ILMN_2819951	Lrp12	0.234715	0.0277226
ILMN_2719473	Asf1b	0.234714	0.0277234
ILMN_2852979	Adh5	-0.234693	0.027738
ILMN_2979089	Pdcd1lg2	-0.234636	0.0277768
ILMN_3047749	Cacnb4	0.234552	0.0278345
ILMN_3144289	Traf3	0.234539	0.0278433
ILMN_3002943	Tmed10	0.234527	0.0278512
ILMN_2690596	Hey1	-0.234506	0.0278658
ILMN_1241444	Ablim1	0.234478	0.0278853
ILMN_2806159	Tmsb4x	0.23446	0.0278975
ILMN_3109300	Pou4f1	-0.234455	0.027901
ILMN_2468007	Wnt16	-0.234417	0.0279268
ILMN_1241648	Folr4	-0.234263	0.0280327
ILMN_2768330	Epc1	-0.234252	0.0280403
ILMN_2947526	Ecm1	0.2341	0.0281456
ILMN_3004939	Cyp2c65	0.234067	0.0281685
ILMN_1231661	Olfr628	-0.233896	0.0282871
ILMN_2623983	Egr2	0.233811	0.0283456
ILMN_2683393	Ret	0.233795	0.0283567
ILMN_2668815	Bclaf1	-0.233773	0.0283723
ILMN_2632532	Cbln3	-0.23367	0.0284442
ILMN_1229975	Ndufc1	-0.233607	0.0284882
ILMN_2659985	BC023818	-0.23347	0.0285838
ILMN_1255513	Cdr2	0.233434	0.0286093
ILMN_3009400	Raver2	0.233391	0.028639
ILMN_3161282	Dpysl5	-0.233343	0.0286734
ILMN_2741985	Rad54l	0.2333	0.0287035
